# Supplementary material for: Characterization of PM 10 sources in the central Mediterranean
Source: Copernicus journal article supplement (doi:10.5194/acp-15-13939-2015), 2015-12-17

Supplement of Atmos. Chem. Phys., 15, 13939–13955, 2015  
<http://www.atmos-chem-phys.net/15/13939/2015/>  
doi:10.5194/acp-15-13939-2015-supplement  
© Author(s) 2015. CC Attribution 3.0 License.

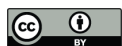

*Supplement of*

## **Characterization of PM<sub>10</sub> sources in the central Mediterranean**

**G. Calzolari et al.**

*Correspondence to:* G. Calzolari (calzolari@fi.infn.it)

The copyright of individual parts of the supplement might differ from the CC-BY 3.0 licence.

5

## 6 **Supplementary material**

7 Rotational ambiguity was tested by systematically exploring solutions with FPEAK  
8 between -1.0 and 1.0, according to a literature approach (e.g., Vecchi et al., 2008). The  
9 following figures show, for every identified factor, the chemical profiles obtained by PMF2  
10 for every FPEAK with variation in Q value below 5%, with respect to the minimum one. All  
11 concentrations are reported with the associated error computed by the PMF2 model. The  
12 chosen solution (with 0.1 FPEAK) is surrounded in red. The choice of one out of all the  
13 rotated solutions was driven not only by the mathematical outputs of the model but also by  
14 physical aspects as the physical sense of the source profiles and temporal evolutions, as well  
15 as physical constraints on the reconstruction of the profiles.

16

17 a) Sea salt

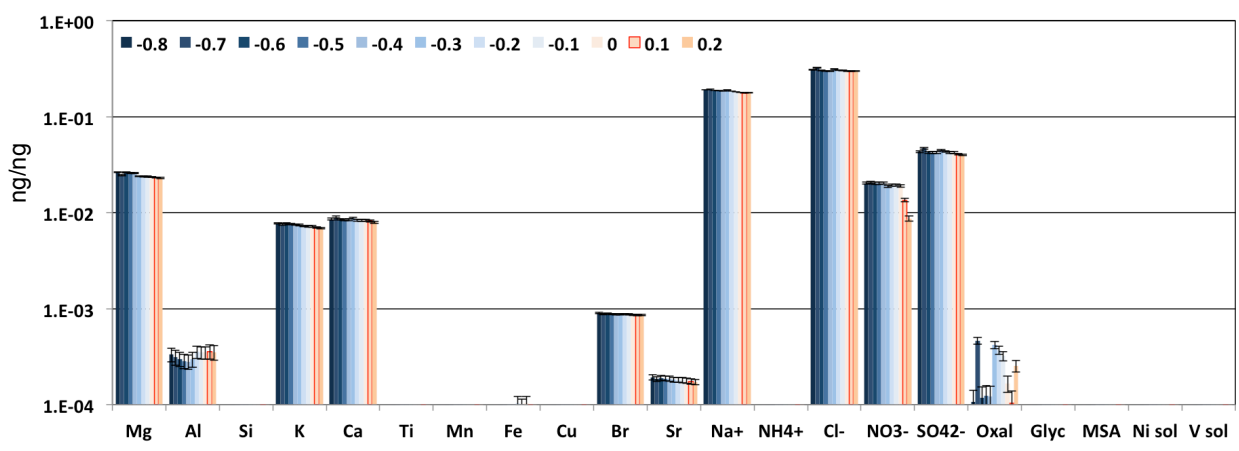

18

19

20

1 b) Mineral dust

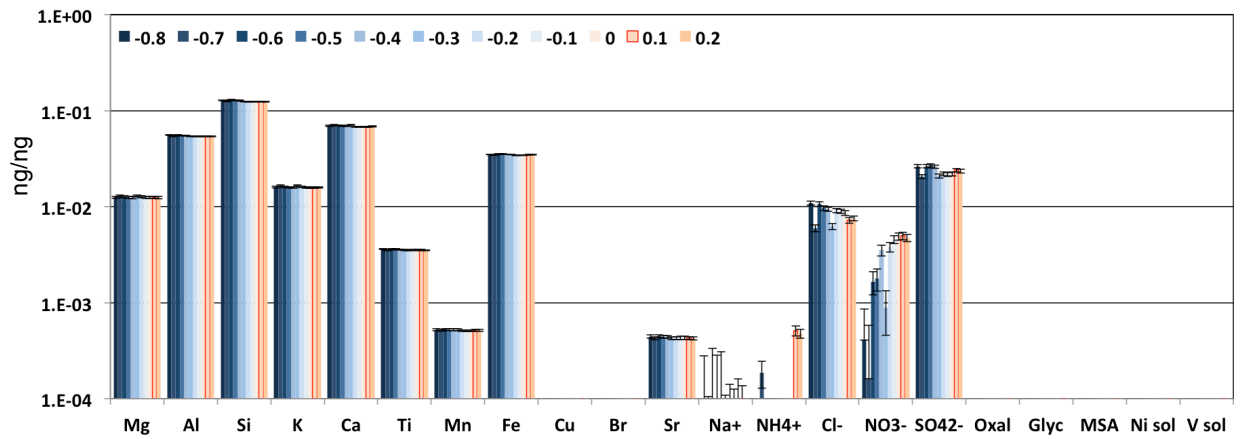

5 c) Biogenic emissions

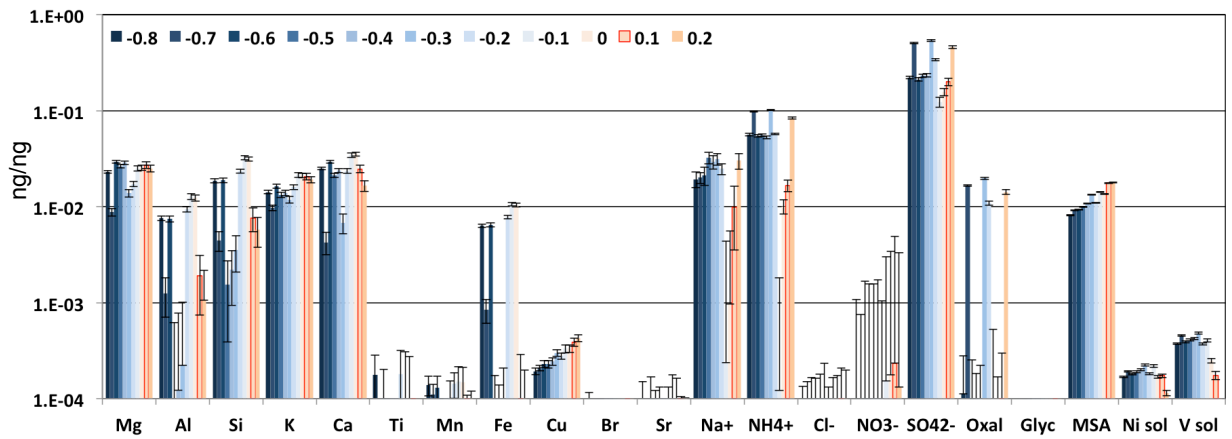

8 d) Secondary nitrate

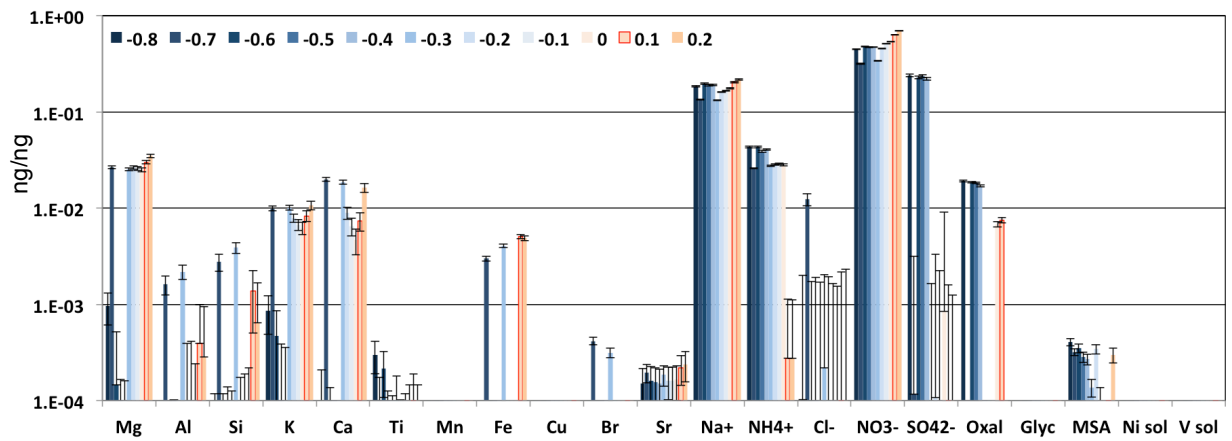

1 e) Secondary sulphate

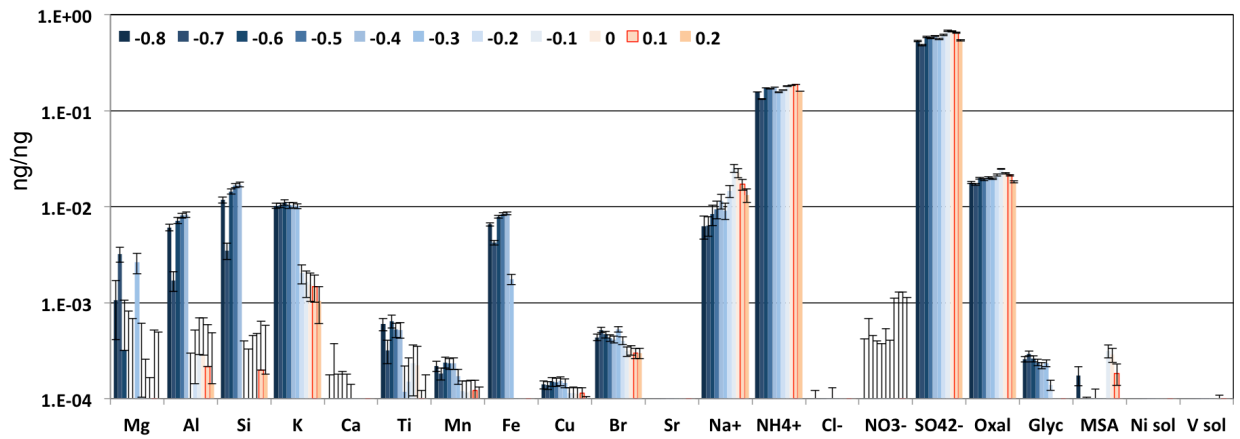

4 f) Primary particulate ship emissions

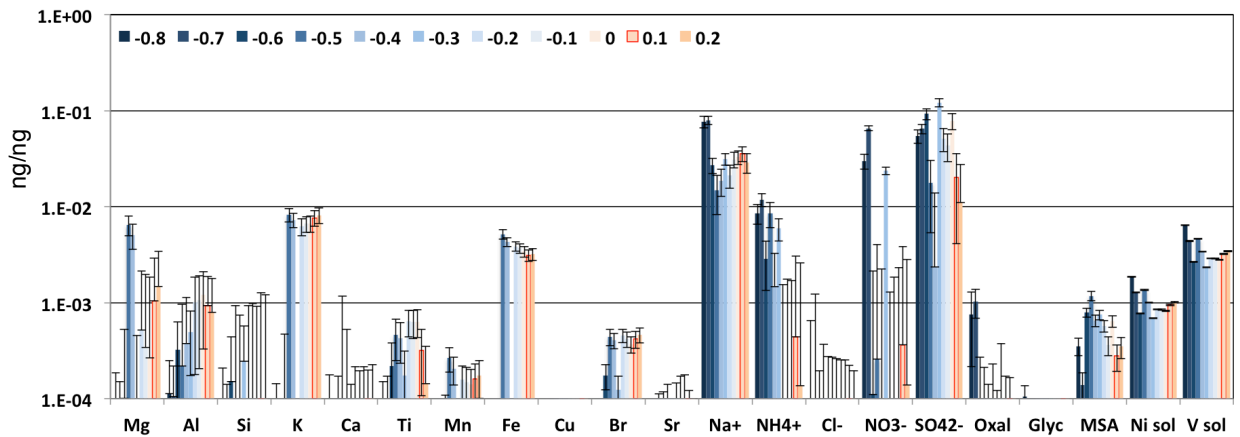

7 g) Combustion emissions

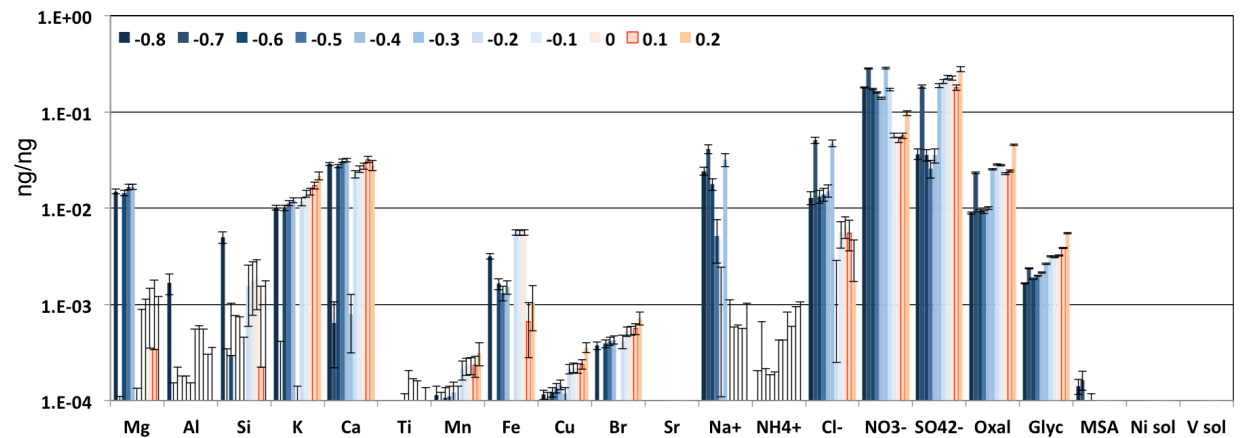

Supplement: Supplementary file 1 [file acp-15-13939-2015-supplement.pdf]
